1 **Seasonal stability and dynamics of DNA methylation in plants in a natural**  
2 **environment**

3

4 Tasuku Ito<sup>a</sup>, Haruki Nishio<sup>a</sup>, Yoshiaki Tarutani<sup>b</sup>, Naoko Emura<sup>a,c</sup>, Mie N. Honjo<sup>a</sup>,  
5 Atsushi Toyoda<sup>d,e</sup>, Asao Fujiyama<sup>e</sup>, Tetsuji Kakutani<sup>b,f</sup>, and Hiroshi Kudoh<sup>a,1</sup>.

6

7 <sup>a</sup>Center for Ecological Research, Kyoto University, Otsu, Shiga 520-2113,  
8 Japan; <sup>b</sup>Department of Chromosome Science, National Institute of Genetics,  
9 Mishima, Shizuoka 411-8540, Japan; <sup>c</sup>Faculty of Agriculture, Kagoshima  
10 University, Korimoto 1-21-24, Kagoshima 890-0065, Japan; <sup>d</sup>Department of  
11 Genomics and Evolutionary Biology, National Institute of Genetics, Mishima,  
12 Shizuoka 411-8540, Japan; <sup>e</sup>Advanced Genomics Center, National Institute of  
13 Genetics, Mishima, Shizuoka 411-8540, Japan; <sup>f</sup>Department of Biological  
14 Sciences, Graduate School of Science, The University of Tokyo, Hongo,  
15 Bunkyo-ku, Tokyo 113-0033, Japan

16

17 <sup>1</sup>Corresponding author: Hiroshi Kudoh; Center for Ecological Research, Kyoto  
18 University, Hirano 2-509-3, Otsu, Shiga 520-2113, Japan; Phone,  
19 +81-77-549-8205; E-mail, kudoh@ecology.kyoto-u.ac.jp.

## 20 **Abstract**

21 Organisms survive in naturally fluctuating environments by responding to  
22 long-term signals, such as seasonality, by filtering out short-term noise. DNA  
23 methylation has been considered a stable epigenetic mark but has also been  
24 reported to change in response to experimental manipulations of biotic and  
25 abiotic factors. However, it is unclear how they behave in natural environments.  
26 Here, we analyzed seasonal patterns of genome-wide DNA methylation at a  
27 single-base resolution using a single clone from a natural population of the  
28 perennial *Arabidopsis halleri*. The genome-wide pattern of DNA methylation was  
29 primarily stable, and most of the repetitive regions were methylated across the  
30 year. Although the proportion was small, we detected seasonally methylated  
31 cytosines (SeMCs) in the genome. SeMCs in the different contexts showed  
32 distinct seasonal patterns of methylation. SeMCs in CHH context were detected  
33 predominantly at repetitive sequences in intergenic regions. Additionally, we  
34 found that CHH methylation within *AhgFLC* locus showed a seasonal pattern  
35 that was negatively associated with changes in gene expression. Gene-body CG

36 methylation (gbM) itself was generally stable across seasons, but the levels of  
37 gbM were positively associated with seasonal stability of RNA expression of the  
38 genes. These results suggest the existence of two distinct aspects of DNA  
39 methylation in natural environments: sources of epigenetic variation and  
40 epigenetic marks for stable gene expression.

41 **Keywords:** *Arabidopsis halleri*, DNA methylation, Natural environment,  
42 seasonal changes, seasonally methylated cytosines

## 43 **Introduction**

44 DNA methylation at cytosine residues is an epigenetic mark that can be  
45 maintained through cell divisions in a wide range of eukaryotic genomes (1). The  
46 previous analyses in diverse organisms have revealed genomic distributions of  
47 DNA methylation vary among organisms (2-7). In plants, DNA-methylation varies  
48 both between and within species (8), and sometimes is associated to phenotypic  
49 variation (9-11). Although the level and patterns of DNA methylation are  
50 heritable to a certain extent, the mechanisms that produce and maintain  
51 epigenetic variation across generations are largely unknown.

52 DNA methylation can vary between individuals also by non-genetic causes.  
53 It has been shown that both biotic and abiotic treatment can modify DNA  
54 methylation (12-14). Because of its semi-stable and semi-labile nature,  
55 non-genetic changes in DNA methylation are not explained by simple  
56 environmental effects. For example, even in a genetically homogeneous  
57 background under stable laboratory conditions, epigenetic variation in DNA  
58 methylation can occur during repeated self-pollination in a transgenerational

59 manner (15, 16). Therefore, it is difficult to predict whether DNA methylation is  
60 stable or dynamic under natural conditions. Recently the need for '*in natura*'  
61 studies has been highlighted in order to understand how organisms respond to  
62 environmental signals by filtering out innumerable fluctuations and noise (17, 18).  
63 In the temperate regions, seasonality is the most prominent cause of  
64 environment fluctuations. However, we still do not understand how DNA  
65 methylation behaves across seasons.

66 In order to reveal the seasonal dynamics of DNA methylation, here, we  
67 conducted an "*in natura*" study on genome-wide DNA methylation using a single  
68 clone growing in a population of *Arabidopsis halleri* (L.) O'Kane & Al-Shehbaz  
69 subsp. *gemmifera* (Matsum.) O'Kane & Al-Shehbaz (hereafter referred to as *A.*  
70 *haleri*), a close relative of *Arabidopsis thaliana*. Its clonal propagation and  
71 perennial life-cycle allowed us to sample leaves all year round from the single  
72 clonal individual (19). We studied seasonal dynamics of key flowering-time  
73 genes and whole transcriptome previously in the site (20, 21). In this study, to  
74 understand the dynamics of DNA methylation, we performed whole-genome

75 bisulfite sequencing (WGBS) at 1.5-month intervals, over a year, under natural  
76 conditions. We adopted the strategy of monitoring the seasonal pattern in a  
77 single clonal individual with a uniform genetic background.

78 DNA methylation occurs in three contexts, according to the flanking  
79 sequence, i.e. CG, CHG and CHH (H = A, C, or T). The former two form  
80 symmetrically and the latter one asymmetrically, in terms of sequences on the  
81 complementary strands. Since these contexts of methylation are distinctly  
82 regulated and associated with DNA replication, histone modification, and  
83 non-coding RNA production (22-24), we examined seasonal patterns of DNA  
84 methylation by conducting single-base resolution analyses.

85 The results suggested the existence of seasonally methylated cytosines  
86 (SeMCs) in the genome, at least for the examined clone. Interestingly, DNA  
87 methylation changes occurred in a context-dependent manner. There were  
88 distinct patterns of seasonal changes among CG, CHG, and CHH methylation.  
89 Moreover, our analysis revealed that genic CG methylation, i.e. gene-body  
90 methylation (gbM), was seasonally stable by itself, and was associated with

91 seasonal stability of RNA expression. This study suggested not only that there is  
92 a dynamic nature in DNA methylation in plants in their natural habitats, but also  
93 highlights the implications of DNA methylation in robust maintenance of stable  
94 RNA expression.

95

## 96 **Results**

97 **Seasonal stability in large-scale distribution of DNA methylation.** To  
98 investigate the dynamics of DNA methylation in a natural environment, we  
99 analyzed genome-wide DNA methylation in a natural population of *A. halleri* (Fig.  
100 1 *A* and *B*). In the study site, the hourly air temperature ranged from -4.3 °C to  
101 36.3 °C during the one-year study period, from Nov 2014 to Sep 2015 (Fig. 1 *C*).  
102 We collected leaves from a single clonal patch of *A. halleri* at 8 sampling times,  
103 at 1.5-month intervals across a year, and performed WGBS (Fig. 1 *C*). From this,  
104 we obtained a series of genome-wide DNA methylation data (Table S1).

105 Bulk DNA methylation levels were relatively constant across the eight time  
106 points, and ca 45%, 20%, and 6% of cytosines in the genome were kept



107 methylated in CG, CHG, and CHH contexts, respectively (Fig. S1A). The  
108 large-scale distribution of DNA methylation was determined by the positions in  
109 the genome, as represented by radial patterns in the circos plot for the longest  
110 30 scaffolds (Fig. 2A). The distribution of methylated sites remained constant  
111 across the 8 sampling times (represented by 8 concentric circles for each  
112 methylation context in Fig 2A). We observed conspicuous aggregation of DNA  
113 methylation on repetitive sequences (Fig 2A). For example, scaffolds 3 and 18 is  
114 characterized by low and high density of repetitive sequences that corresponded  
115 to relatively low and high methylation levels, respectively (Fig 2A). In the  
116 comparative analysis between genic and repetitive regions for the whole  
117 genome, the level of DNA methylation in repetitive sequences was higher than  
118 that in genes (Fig. S1B). A similar pattern was confirmed by an analysis using  
119 100 kbp windows for the whole genome (Fig. 2B). The level of DNA methylation  
120 was correlated with density of repeats in each window for all three contexts in all  
121 samples (e.g. Fig. 2B for Nov. 2014, Pearson's correlation coefficients were 0.64,  
122 0.68, and 0.70 for CG, CHG, and CHH context, respectively; Table S2 for the

123 other sampling times). Although aggregation of DNA methylation at repetitive  
124 sequences was similar to the patterns previously reported in related  
125 Brassicaceae (2, 3, 25), seasonal stability in large-scale distribution of DNA  
126 methylation was reported for the first time here.

127

128 **SeMCs: Seasonal dynamics of DNA methylation.** Next, we searched for  
129 SeMCs by detecting differently methylated cytosines in the genome across the  
130 eight time points (Fisher's exact test;  $P < 0.001$ ; FDR  $< 0.2$ ). The majority of  
131 cytosines did not show statistical differences in methylation across the year, and  
132 the proportion of SeMCs was less than 0.5% of total cytosines (Fig. S2 A and B).  
133 Still, we detected 62,716, 47,140, and 179,385 SeMCs in CG, CHG, and CHH  
134 contexts, respectively (Fig. 3A). They showed diverse seasonal patterns in their  
135 level of methylation across the year (Fig. 3A). Interestingly, each context of DNA  
136 methylation showed distinct patterns of seasonal change: the number of SeMCs  
137 that peaked in a particular month was the highest in July, March, and September  
138 in CG, CHG, and CHH contexts, respectively (Fig. 3B). Differences among

139 contexts of SeMCs would reflect the responsiveness of the regulatory  
140 mechanisms of DNA methylation to environmental cues.

141

142 **CHH SeMCs in repetitive sequences.** The distribution of SeMCs in the  
143 genome differed between the contexts of DNA methylation. The majority of  
144 SeMCs in CHH context (CHH-SeMCs) were found in intergenic regions (those  
145 annotated as neither exons nor introns) while CG-SeMCs and CHG-SeMCs  
146 were in both genic and intergenic regions (Fig. 4A). Given that large fractions of  
147 the eukaryotic genome are intergenic regions and consist of repetitive  
148 sequences such as transposable elements (26, 27), we compared the level of  
149 CHH methylation for all repetitive sequences in the genome of *A. halleri*. The  
150 median level of methylation was the highest in autumn, i.e., September and  
151 November (Fig. 4B), and the pattern was similar to that of whole-genome  
152 CHH-SeMCs. An example of seasonal changes in CHH methylation level in a  
153 LINE/L1 showed low and high levels in February-March and  
154 September-November, respectively (Fig. 4C). The highest methylation levels in

155 autumn were detected in other selected families of repetitive sequences, such as  
156 LTR/Copia, LTR/Gypsy, LINE/L1, DNA/MULE-MuDR, DNA/hAT, and  
157 RC/Helitron (Fig. S3).

158 In addition, we found some repetitive sequences that showed a unique  
159 seasonal pattern of CHH methylation. For example, in the intronic repeat at the  
160 locus of *FLOWERING LOCUS C* homolog (*AhgFLC*). *AhgFLC* expression is  
161 regulated seasonally and suppresses flowering when it is upregulated (20). We  
162 found that a SINE-like repetitive sequence in the first intron of *AhgFLC* showed a  
163 seasonal change of CHH methylation. The level was the highest in March and  
164 the lowest in June (Fig. 4D). Interestingly, this seasonal pattern was opposite to  
165 that of RNA expression of *AhgFLC* (Fig. 4E). The presence of interactions  
166 between transcription and CHH methylation in the intragenic repeat at *AhgFLC*  
167 is expected.

168

169 **Gene-body CG methylation (gbM) and constant RNA expression.** Previous  
170 studies have reported that gbM is localized to active genes in a wide range of

171 eukaryotes (5, 6). In *A. thaliana*, DNA methylation at the gene body is primarily  
172 observed in CG context (2, 3, 25). We examined seasonal patterns of gbM in *A.*  
173 *halleri* and found that the level of gbM was constant across seasons, both in  
174 medians and quantiles of all genes (Fig. S4A), and at the individual gene level  
175 (Fig. S4B).

176 In order to examine the potential role of gbM in gene regulation, we tested  
177 whether the level of gbM associated to seasonal patterns of RNA expression  
178 using previously published data of a two-year seasonal RNA-seq of *A. halleri* at  
179 the same study site (21). We found that genes with high gbM often have  
180 constant levels of RNA expression across the year. One such example was  
181 *AhgPP2AA3* (Fig 5 A and B), the homolog of *PROTEIN PHOSPHATASE 2A*  
182 *SUBUNIT A3*, a gene that is known as one that is constantly-expressed under  
183 various conditions in *A. thaliana* (28). This is in contrast to the situation of  
184 *AhgFLC* locus, a representative of seasonally expressed genes, which lacks CG  
185 methylation from the entire locus, except for the repetitive sequence in the first  
186 intron (Fig. 5 C and D). Based on these observations, we hypothesized that gbM

187 would be associated to constant RNA expression across seasons. To test this  
188 hypothesis, we calculated the seasonal average and range of RNA expression  
189 for each gene, then compared them between genes with different levels of gbM  
190 (Fig. 5 *E* and *F*). Genes that were highly methylated in CG context showed  
191 relatively high average levels of RNA expression (Fig. 5*E*). The magnitude of  
192 seasonal changes in RNA expression of these genes decreased with increasing  
193 levels of gbM (Fig 5*F*). These results are consistent with the hypothesis  
194 mentioned above. The genes with the highest methylation level (in ‘group 5’ in  
195 Fig 5 *E* and *F*) were weakly enriched with four GOs of basic functions (Table S3).  
196

## 197 **Discussion**

198 In this study, we examined the seasonal patterns of DNA methylation at CG,  
199 CHG, and CHH contexts in *Arabidopsis halleri*, under natural conditions. We  
200 identified the genomic sites that showed seasonal changes in DNA methylation.  
201 Our observations suggest that seasonal factors in the natural habitat could affect  
202 DNA methylation differently according to its context and location in the genome.

203 We would like to note here that, since our data set came from a single clonal  
204 individual for a single year, the genetic and non-genetic effects between different  
205 clones should be explored in future studies by applying WGBS to a  
206 population-level study with multiple repeat samples.

207 CHH methylation showed seasonal changes in diverse repetitive elements,  
208 and the level of DNA methylation was high in autumn, and low in winter. In *A.*  
209 *thaliana*, it has been reported that the level of CHH methylation in transposable  
210 elements was higher in 16°C environments relative to 10°C (13). Additionally, it  
211 has been suggested that RNA-directed DNA methylation (RdDM) pathway,  
212 which is required for maintenance and *de novo* methylation and mainly targets  
213 transposable elements, are involved in heat tolerance (29). This suggests that  
214 our observation on CHH SeMCs could reflect the temperature-dependence of  
215 the regulation of CHH methylation.

216 Seasonal changes detected in CHH methylation at a repetitive element in  
217 *AhgFLC* was an interesting example showing how genic heterochromatin  
218 behaves in genes. We observed that the seasonal pattern of CHH methylation in

219 this particular repetitive element was opposite to that of the expression of  
220 *AhgFLC* gene. *FLC* and its homologs in Brassicaceae species contain  
221 conserved structures in its second intron called VRE (vernalization response  
222 element), which is involved in responsiveness to cold treatment (30, 31).  
223 Expression of *FLC* has been reported to be repressed by long-term cold  
224 treatment (vernalization), accompanied by enrichment of tri-methylation of  
225 histone H3 lysine 27 (H3K27me3) at the TSS site in the beginning of cold  
226 treatment, and then by H3K27me3 accumulation across gene body region after  
227 the plants returned to warmer temperatures (32). On the contrary, the  
228 expression of genes is associated with the removal of H3K27me3 from their  
229 bodies (33). These reports and our results suggest that epigenetic regulation of  
230 *AhgFLC* gene might be responsible for seasonal removal of CHH methylation in  
231 its intronic repeat. The disruption of transcription in genes has been reported to  
232 induce ectopic CHH methylation in *A. thaliana* (34).

233 Large-scale patterns of DNA methylation were constant throughout the  
234 year for all three contexts, although there were seasonal changes in DNA



235 methylation at some cytosine sites. Constant levels of CG methylation were  
236 observed in gene body, and, furthermore, we found that genes with high levels of  
237 gbM showed seasonal stability in their gene expression. Although the function of  
238 gbM is still unclear (35), our results support previous reports, in *A. thaliana*, that  
239 gbM associates with genes modestly expressed among different tissues and  
240 experimental conditions (6, 36-38), and imply the importance of gbM under  
241 seasonal environment in a natural habitat.

242       Currently, we cannot entirely explain the patterns of DNA methylation in  
243 SeMCs, particularly in CG or CHG contexts. It is very likely that there are  
244 unidentified processes associated with environmental responses of DNA  
245 methylation that have not been studied under laboratory conditions. As  
246 mentioned above, the question remains of how the epigenetic variations in  
247 plants have been established in natural fluctuating environment (39, 40). Here,  
248 we focused on representative environmental effects on DNA methylation in a  
249 single clonal individual. In future studies of DNA methylation, we need to  
250 evaluate not only genotype effects, but also, so called 'linage effects' that

251 represent past genetic and environmental effects. Furthermore, we should test  
252 to what extent seasonal changes in DNA methylation contribute to the variation  
253 in phenotypes in natural environments.

254

## 255 **Materials and Methods**

256 **Plant materials.** This study was conducted in a natural population of  
257 *Arabidopsis halleri* subsp. *gemmifera* located in central Japan (Omoide-gawa  
258 site, Naka-ku, Taka-cho, Hyogo Pref., 35°06' N, 134°55' E, altitude 190–230 m).  
259 Details of the study site have been described previously (19, 20). Leaf samples  
260 were collected at noon on the following dates: November 11 and December 22,  
261 2014, and February 9, March 24, May 7, June 23, July 28, and September 8,  
262 2015. In the study site, *A. halleri* forms patches of rosettes that consist of clonally  
263 propagated plants and sometimes genetically-related seed-originated plants.  
264 Originally six small patches of plants were chosen for leaf sampling, three of  
265 them were used for further analyses because the others were heavily damaged  
266 by deer herbivory between November 11 and December 22 in 2014. At each

267 sampling date, we harvested multiple mature and intact leaves from each plant.  
268 Each leaf was ca. 3-cm long, and weighed ca. 0.1 g. To detect DNA methylation  
269 and RNA expression in the same set of leaves, a small piece was collected from  
270 each leaf for RNA extraction. For DNA extraction, leaves were frozen in an  
271 ethanol bath with dry ice, then stored at -80 °C. For RNA extraction, the small  
272 pieces of leaves were stored in *RNAlater* solution (Invitrogen, Carlsbad, CA,  
273 USA), then stored at -20 °C according to the manufacturer's instructions. The  
274 data for one patch were analyzed and shown in the main text, because the other  
275 two patches were found to be genetically mixed (Fig. S5). The samples analyzed  
276 here were confirmed to share whole-genome SNPs at levels that were safely  
277 judged to be a single clone (Fig. S5).

278

279 **DNA extraction and WGBS library preparation.** Genomic DNA was extracted  
280 from collected leaves (two leaves per plant, ca. 0.2 g) using the CTAB method  
281 (41). Libraries for WGBS were constructed as described previously (42).  
282 Sequencing was performed with the Illumina HiSeq 2500 system.

283

284 **Processing of WGBS data.** Sequenced reads were trimmed using  
285 Trimmomatic (43). Trimmed reads were mapped onto the genome sequence of  
286 *A. halleri* (44) using Bismark (45) and Bowtie2 (46). Repetitive sequences in the  
287 genome were detected using RepeatModeler (47), and repeats with at least 50  
288 bp length were used for further analyses. The level of DNA methylation was  
289 calculated for each context using the ratio of the number of methylated cytosines  
290 to the number of total sequenced cytosine included in any region of the genome.  
291 Efficient bisulfite treatment (> 99% in all samples) was confirmed using the level  
292 of DNA methylation in unmethylated lambda DNA (Table S4). SeMC was defined  
293 as any cytosine differently methylated between at least two time points, detected  
294 by Fisher's exact test, with genome-wide FDRs that were calculated using  
295 Storey's method (48). To draw the heatmaps of methylation of SeMCs, cluster  
296 3.0 (49) and Java Treeview (50) were used. To draw a circos plot for  
297 scaffold-wide DNA methylation, Circos software (51) was used. To make  
298 browser views of DNA methylation, Integrated Genome Viewer (52) was used.

299 To draw a dendrogram of collected samples, MethylExtract (53), VCF-kit  
300 (<https://vcf-kit.readthedocs.io>), and Dendroscope3 (54) were used.

301

302 **Transcriptome analysis.** RNA extraction and library preparation for RNA-seq  
303 were performed using the shotgun type method of BrAD-seq protocol (55).

304 Sequencing was performed with the Illumina Hiseq 2500 system. Mapping of the  
305 reads and calculation of RPM were processed as described previously (21)

306 except that the reference sequence was replaced with a newer annotation (44).

307 To calculate seasonal average and range of expression of genes more precisely,  
308 weekly sampled RNA-seq data from a two-year period (21) were re-analyzed. To

309 quantify the expression, Kallisto software was used (56). Calculation of seasonal  
310 average and range of RNA expression was based on previously described

311 methods (21).

312

### 313 **Data availability**

314 Raw WGBS and RNA-Seq reads are available under the DDBJ BioProject

315 PRJDB7785.

316

### 317 **Acknowledgement**

318 We thank Jiro Sugisaka for technical assistance, Takaomi Hatakeyama for  
319 information on *A. halleri* genome sequence, Atsushi J. Nagano for advice on  
320 analysis of RNA-seq data, and Kentaro K. Shimizu for comments on the  
321 manuscript. Computations were partially performed on the NIG supercomputer  
322 at NIG, Japan. This study was supported by JSPS Grant-in-Aid for Scientific  
323 Research (S) 26221106 and JST CREST JPMJCR15O1 to HK; Grant-in-Aid for  
324 JSPS Fellows by Japanese Society for Promoting Science (17J02659) to TI;  
325 Systems Functional Genetics Project of the Transdisciplinary Research  
326 Integration Center, ROIS, Japan to A.T., A.F., Y.T., and T.K.

327

### 328 **Author contributions**

329 H.K. and T.K. conceived the study. T.I., H.N., H.K., and T.K. designed the  
330 experiments. H.N. collected samples. Y.T., A.T., and A.F. performed

331 whole-genome bisulfite sequencing. N.E. and M.N.H. performed RNA  
332 sequencing. T.I. analyzed the data. T.I. and H.K. wrote the paper and  
333 incorporated comments from co-authors.

334

### 335 **Conflict of interest**

336 The authors declare that they have no conflicts of interests.

337

### 338 **References**

- 339 1. Law JA, Jacobsen SE (2010) Establishing, maintaining and modifying DNA  
340 methylation patterns in plants and animals. *Nat Rev Genet* 11:204–220.
- 341 2. Cokus SJ, et al. (2008) Shotgun bisulphite sequencing of the *Arabidopsis*  
342 genome reveals DNA methylation patterning. *Nature* 452:215–219.
- 343 3. Lister R, et al. (2008) Highly integrated single-base resolution maps of the  
344 epigenome in *Arabidopsis*. *Cell* 133:523–536.
- 345 4. Lister R, et al. (2009) Human DNA methylomes at base resolution show  
346 widespread epigenomic differences. *Nature* 462:315–322.

- 347 5. Feng S, et al. (2010) Conservation and divergence of methylation patterning  
348 in plants and animals. *Proc Natl Acad Sci USA* 107:8689–8694.
- 349 6. Zemach A, McDaniel IE, Silva P, Zilberman D (2010) Genome-wide  
350 evolutionary analysis of eukaryotic DNA methylation. *Science* 328:916–919.
- 351 7. Huff JT, Zilberman D (2014) Dnmt1-Independent CG methylation contributes  
352 to nucleosome positioning in diverse eukaryotes. *Cell* 156:1286–1297.
- 353 8. Niederhuth CE, et al. (2016) Widespread natural variation of DNA  
354 methylation within angiosperms. *Genome Biol* 17:194.
- 355 9. Cubas P, Vincent C, Coen E (1999) An epigenetic mutation responsible for  
356 natural variation in floral symmetry. *Nature* 401:157–161.
- 357 10. Manning K, et al. (2006) A naturally occurring epigenetic mutation in a gene  
358 encoding an SBP-box transcription factor inhibits tomato fruit ripening. *Nat*  
359 *Genet* 38:948–952.
- 360 11. Ong-Abdullah M, et al. (2015) Loss of Karma transposon methylation  
361 underlies the mantled somaclonal variant of oil palm. *Nature* 525:533–537.
- 362 12. Downen RH, et al. (2012) Widespread dynamic DNA methylation in response



- 363 to biotic stress. *Proc Natl Acad Sci USA* 109:E2183–E2191.
- 364 13. Dubin MJ, et al. (2015) DNA methylation in *Arabidopsis* has a genetic basis  
365 and shows evidence of local adaptation. *eLife* 4:elife.05255.
- 366 14. Secco D, et al. (2015) Stress induced gene expression drives transient DNA  
367 methylation changes at adjacent repetitive elements. *eLife* 4:e09343.
- 368 15. Becker C, et al. (2011) Spontaneous epigenetic variation in the *Arabidopsis*  
369 *thaliana* methylome. *Nature* 480:245–249.
- 370 16. Schmitz RJ, et al. (2011) Transgenerational epigenetic instability is a source  
371 of novel methylation variants. *Science* 334:369–373.
- 372 17. Shimizu KK, Kudoh H, Kobayashi MJ (2011) Plant sexual reproduction  
373 during climate change: gene function *in natura* studied by ecological and  
374 evolutionary systems biology. *Ann Bot* 108:777–787.
- 375 18. Kudoh H (2016) Molecular phenology in plants: *in natura* systems biology for  
376 the comprehensive understanding of seasonal responses under natural  
377 environments. *New Phytol* 210:399–412.
- 378 19. Kudoh H, Honjo MN, Nishio H, Sugisaka J (2018) The long-term “*in natura*”

- 379 study sites of *Arabidopsis halleri* for plant transcription and epigenetic  
380 modification analyses in natural environments. *Methods Mol Biol* 1830:41–  
381 57.
- 382 20. Aikawa S, Kobayashi MJ, Satake A, Shimizu KK, Kudoh H (2010) Robust  
383 control of the seasonal expression of the *Arabidopsis FLC* gene in a  
384 fluctuating environment. *Proc Natl Acad Sci USA* 107:11632–11637.
- 385 21. Nagano AJ, et al. (2019) Annual transcriptome dynamics in natural  
386 environments reveals plant seasonal adaptation. *Nat Plants* 5:74–83.
- 387 22. Stroud H, et al. (2013) Non-CG methylation patterns shape the epigenetic  
388 landscape in *Arabidopsis*. *Nat Struct Mol Biol* 21:64–72.
- 389 23. Kawashima T, Berger F (2014) Epigenetic reprogramming in plant sexual  
390 reproduction. *Nat Rev Genet* 15:613–624.
- 391 24. He Y, Ecker JR (2015) Non-CG methylation in the human genome. *Annu Rev*  
392 *Genomics Hum Genet* 16:55–77.
- 393 25. Seymour DK, Koenig D, Hagemann J, Becker C, Weigel D (2014) Evolution of  
394 DNA methylation patterns in the Brassicaceae is driven by differences in

- 395 genome organization. *PLoS Genet* 10:e1004785.
- 396 26. Fedoroff NV (2012) Transposable elements, epigenetics, and genome  
397 evolution. *Science* 338:758–767.
- 398 27. Tenaillon MI, Hollister JD, Gaut BS (2010) A triptych of the evolution of plant  
399 transposable elements. *Trends Plant Sci* 15:471–478.
- 400 28. Czechowski T (2005) Genome-wide identification and testing of superior  
401 reference genes for transcript normalization in *Arabidopsis*. *Plant Physiol*  
402 139:5–17.
- 403 29. Popova OV, Dinh HQ, Aufsatz W, Jonak C (2013) The RdDM Pathway Is  
404 required for basal heat tolerance in *Arabidopsis*. *Mol Plant* 6:396–410.
- 405 30. Sung S, et al. (2006) Epigenetic maintenance of the vernalized state in  
406 *Arabidopsis thaliana* requires LIKE HETEROCHROMATIN PROTEIN 1. *Nat*  
407 *Genet* 38:706–710.
- 408 31. Castaings L, et al. (2014) Evolutionary conservation of cold-induced  
409 antisense RNAs of *FLOWERING LOCUS C* in *Arabidopsis thaliana* perennial  
410 relatives. *Nat Commun* 5:4457. doi:10.1038/ncomms5457.

- 411 32. Song J, Irwin J, Dean C (2013) Remembering the prolonged cold of winter.  
412 *Curr Biol* 23:R807–R811.
- 413 33. Buzas DM, Robertson M, Finnegan EJ, Helliwell CA (2011)  
414 Transcription-dependence of histone H3 lysine 27 trimethylation at the  
415 *Arabidopsis* polycomb target gene *FLC*. *Plant J* 65:872–881.
- 416 34. Inagaki S, et al. (2010) Autocatalytic differentiation of epigenetic  
417 modifications within the *Arabidopsis* genome. *EMBO J* 29:3496–3506.
- 418 35. Zilberman D (2017) An evolutionary case for functional gene body  
419 methylation in plants and animals. *Genome Biol* 18:87.
- 420 36. Zhang X, et al. (2006) Genome-wide high-resolution mapping and functional  
421 analysis of DNA methylation in *Arabidopsis*. *Cell* 126:1189–1201.
- 422 37. Aceituno FF, Moseyko N, Rhee SY, Gutiérrez RA (2008) The rules of gene  
423 expression in plants: Organ identity and gene body methylation are key  
424 factors for regulation of gene expression in *Arabidopsis thaliana*. *BMC*  
425 *Genomics* 9:438.
- 426 38. Coleman-Derr D, Zilberman D (2012) Deposition of histone variant H2A.Z

- 427 within gene bodies regulates responsive genes. *PLoS Genet* 8:e1002988.
- 428 39. Richards EJ (2006) Inherited epigenetic variation — revisiting soft inheritance.
- 429 *Nat Rev Genet* 7:395–401.
- 430 40. Weigel D, Colot V (2012) Epialleles in plant evolution. *Genome Biol* 13:249.
- 431 41. Saghai-Maroo MA, Soliman KM, Jorgensen RA, Allard RW (1984)
- 432 Ribosomal DNA spacer-length polymorphisms in barley: mendelian
- 433 inheritance, chromosomal location, and population dynamics. *Proc Natl Acad*
- 434 *Sci USA* 81:8014–8018.
- 435 42. Fu Y, et al. (2013) Mobilization of a plant transposon by expression of the
- 436 transposon-encoded anti-silencing factor. *EMBO J* 32:2407–2417.
- 437 43. Bolger AM, Lohse M, Usadel B (2014) Trimmomatic: a flexible trimmer for
- 438 Illumina sequence data. *Bioinformatics* 30:2114–2120.
- 439 44. Briskine RV, et al. (2016) Genome assembly and annotation of *Arabidopsis*
- 440 *halleri*, a model for heavy metal hyperaccumulation and evolutionary ecology.
- 441 *Mol Ecol Resour* 17:1025–1036.
- 442 45. Krueger F, Andrews SR (2011) Bismark: a flexible aligner and methylation

- 443 caller for Bisulfite-Seq applications. *Bioinformatics* 27:1571–1572.
- 444 46. Langmead B, Salzberg SL (2012) Fast gapped-read alignment with Bowtie 2.
- 445 *Nat Methods* 9:357–359.
- 446 47. Smit AFA, Hubley R (2008-2015) RepeatModeler Open-1.0.
- 447 <http://www.repeatmasker.org>.
- 448 48. Storey JD (2002) A direct approach to false discovery rates. *J R Stat Soc*
- 449 *Series B Stat Methodol* 64:479–498.
- 450 49. de Hoon MJL, Imoto S, Nolan J, Miyano S (2004) Open source clustering
- 451 software. *Bioinformatics* 20:1453–1454.
- 452 50. Saldanha AJ (2004) Java Treeview—extensible visualization of microarray
- 453 data. *Bioinformatics* 20:3246–3248.
- 454 51. Krzywinski M, et al. (2009) Circos: An information aesthetic for comparative
- 455 genomics. *Genome Res* 19:1639–1645.
- 456 52. Robinson JT, et al. (2011) Integrative genomics viewer. *Nat Biotechnol*
- 457 29:24–26.
- 458 53. Barturen G, Rueda A, Oliver JL, Hackenberg M (2013) Methylextract.

459 doi:10.5281/zenodo.7144.

460 54. Huson DH, Scornavacca C (2012) Dendroscope 3: An Interactive Tool for  
461 Rooted Phylogenetic Trees and Networks. *Syst Biol* 61:1061–1067.

462 55. Townsley BT, Covington MF, Ichihashi Y, Zumstein K, Sinha NR (2015)  
463 BrAD-seq: Breath Adapter Directional sequencing: a streamlined,  
464 ultra-simple and fast library preparation protocol for strand specific mRNA  
465 library construction. *Front Plant Sci* 6. doi:10.3389/fpls.2015.00366.

466 56. Bray NL, Pimentel H, Melsted P, Pachter L (2016) Near-optimal probabilistic  
467 RNA-seq quantification. *Nat Biotechnol* 34:525–527.

468 **Figure Legends**

469

470 **Fig. 1.** Sampling site and dates for the seasonal DNA-methylation analysis in a  
471 natural population of *Arabidopsis halleri* subsp. *gemmifera*. (A) A photograph of  
472 the study site alongside a small stream through the *Cryptomeria* and  
473 *Chamaecyparis* plantation in Hyogo Prefecture, Japan. Red arrows indicate  
474 individuals of *A. halleri*. (B) An individual of *A. halleri* in the study site. The cage  
475 was used for protection against deer herbivory. White bar indicates 100 mm. (C)  
476 Sampling dates (8 time points) and temperature regimes during the study period.  
477 Sampling was performed every ca. 1.5 month for a year. The red line indicates  
478 hourly air temperature, and dotted lines represent timings of the sampling.

479

480 **Fig. 2.** Genomic pattern of DNA methylation across a year. (A) A circos plot  
481 showing seasonal patterns (8 time points) of DNA methylation in CG, CHG, and  
482 CHH contexts for the longest 30 scaffolds of *A. halleri*. On the outermost circle,  
483 scaffold positions are indicated by numbers and black bars with scales (one



484 scale = 0.4 Mbp). Each shaded/colored circle represents the scaffold-wide  
485 distribution of genomic attributes for each 100-Kb window. The second  
486 outermost circle represents density of repetitive sequences (including  
487 transposable elements). Each tile indicates the density: the lowest in white, the  
488 highest in black (0–0.5). The next 24 circles represent DNA methylation levels at  
489 8 time points (starting from Nov 24, 2014 to Sep 8, 2015, towards the inner  
490 circles shown by the arrows) for CG, CHG, and CHH contexts, respectively.  
491 Colors in each tile indicates level of methylation: the lowest as blue, the highest  
492 as red (0–0.9 for CG context, 0–0.5 for the others). (B) Scattering plots  
493 comparing CG, CHG, and CHH DNA methylation against TE density for all 100  
494 kbp windows across the 30 scaffolds.

495

496 **Fig. 3.** Annual patterns of seasonally-methylated cytosines (SeMCs). (A)  
497 Heatmaps of seasonally methylated cytosines (SeMCs) in CG, CHG, and CHH  
498 contexts (from left to right; n = 62,716, 47,140, 179,385, respectively). Each row  
499 indicates a series of DNA methylation ratios across a year in each position in the

500 genome (0: unmethylated, 1; fully methylated). The dendrogram on the left of  
501 each heatmap represents the result of hierarchical clustering of SeMCs.  
502 Distance in the dendrogram was based on Pearson's correlation coefficient. (B)  
503 Barplot showing the distribution of peak timings of methylation level for the  
504 SeMCs in CG, CHG, and CHH contexts (from left to right, respectively).

505

506 **Fig. 4.** SeMCs in the CG, CHG, and CHH contexts, and seasonal patterns in  
507 CHH DNA methylation levels. (A) Pie charts indicating locations (exon, intron,  
508 and intergenic regions) of seasonally methylated cytosines (SeMCs) in CG, CHG,  
509 and CHH contexts (from left to right, respectively). (B) Boxplots of CHH  
510 methylation at 8 time points in repetitive elements. The boxes span from the first  
511 to the third quartiles, the thick black bars inside the boxes are the medians,  
512 whiskers above and below the boxes represent  $1.5 \times$  interquartile ranges from  
513 the quartiles. Dotted line indicates the median CHH methylation level in Nov.  
514 2014. (C and D) Browser views for seasonal patterns of CHH methylation on  
515 repeat sequences in one of LINE/L1 sequences (C) and *AhgFLC* locus (D).

516 Orange rectangles indicates exons. A gray rectangle in the *AhgFLC* locus  
517 indicates a repetitive sequence. (E) Comparison between RNA expression of  
518 *AhgFLC* and CHH methylation of the repetitive sequence in its intron.

519

520 **Fig. 5. CG DNA methylation and stability of gene expression.** (A-D) Browser  
521 views of seasonal patterns of CG methylation (A and C) and the two-year  
522 dynamics of RNA expression level (B and D; from September 2011 to August  
523 2013) for *AhgPP2AA3* (*g04731*) and *AhgFLC* (*g19190*), respectively. Orange  
524 rectangles indicate exons. A gray rectangle indicates a repetitive sequence in  
525 the *AhgFLC* locus. (E, F) Boxplots showing relationship between DNA  
526 methylation in CG context and the average (E) and range (F) of RNA expression  
527 of genes. Only expressed genes (average expression level ( $\log_2(\text{RPM}) > 1$ )) are  
528 used for these analyses. Genes were split into five bins according to quintiles of  
529 genic DNA methylation in CG context. The boxes span from the first to the third  
530 quartiles, the bands inside the boxes are the medians, whiskers above and  
531 below the boxes represent  $1.5 \times$  interquartile ranges from the quartiles. Different

532 letters represent significant differences between groups in the Mann-Whitney  
533 test,  $P < 0.01$  adjusted for multiple comparisons.

534

535 **Fig. S1.** Genome-wide bulk DNA methylation level at eight time points across a  
536 year. Genome-wide bulk DNA methylation levels are shown in CG, CHG, and  
537 CHH context for the whole genome (*A*), and gene and repetitive sequences (*B*).  
538 Eight sampling timings are represented by the different shades.

539

540 **Fig. S2.** DNA methylation was seasonally stable at a majority of CG, CHG, and  
541 CHH sites. Histograms of seasonal differences of DNA methylation (max. – min.)  
542 for all cytosine sites (*A*), and for SeMCs (*B*) in CG, CHG, and CHH contexts.

543

544 **Fig. S3.** Seasonal patterns in CHH DNA methylation in repetitive elements that  
545 belong to the six major families of transposable elements (TEs). The boxes span  
546 from the first to the third quartiles, the thick black bars inside the boxes are the  
547 medians, whiskers above and below the boxes represent  $1.5 \times$  interquartile

548 ranges from the quartiles.

549

550 **Fig. S4.** Seasonal patterns in CG gene body methylation (gbM) across a year.

551 (A) Boxplot of DNA methylation in genes in CG context at eight time points

552 across a year. The boxes span from the first to the third quartiles, the thick black

553 bars inside the boxes are the medians, whiskers above and below the boxes

554 represent  $1.5 \times$  interquartile ranges from the quartiles. (B) A histogram of

555 seasonal difference for DNA methylation in genes (max. – min.) in CG context.

556

557 **Fig. S5.** Some patches of *A. halleri* turned to be genetically mixed. A

558 dendrogram shows Kimura's genetic distance using genome-wide SNPs among

559 the samples in three patches for eight timepoints. The samples from replicate 1

560 were judged to be a single clone. *A. halleri* is an obligate outcrossing species

561 with a self-incompatible breeding system, and therefore a large portion of SNPs

562 are expected to be heterozygous. Because heterozygous SNPs can be

563 designated as homozygous to either of the alleles in a certain probability, a

564 terminal radial branching is expected to be observed even for genetically

565 identical plants that belong to a single clonal patch (Rep. 1).

**A**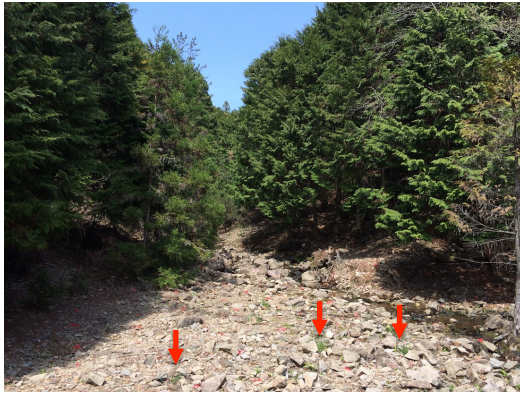**B**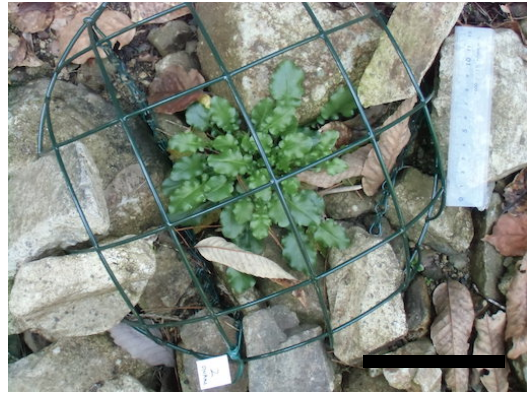**C**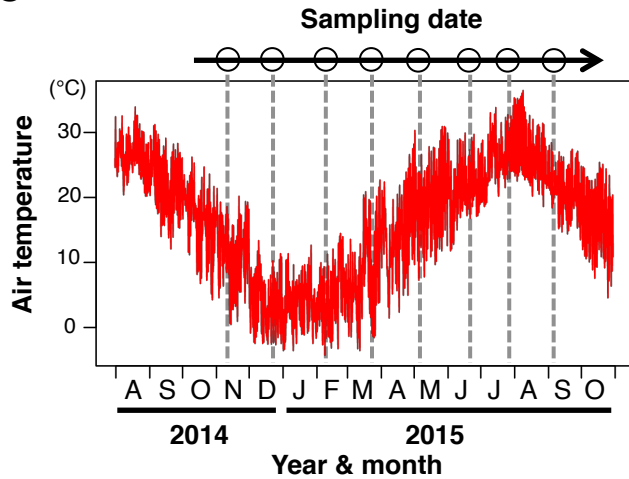

**Fig. 1. Sampling site and dates for the seasonal DNA-methylation analysis in a natural population of *Arabidopsis halleri* subsp. *gemmaifera*.** (A) A photograph of the study site alongside a small stream through the *Cryptomeria* and *Chamaecyparis* plantation in Hyogo Prefecture, Japan. Red arrows indicate individuals of *A. halleri*. (B) An individual of *A. halleri* in the study site. The cage was used for protection against deer herbivory. White bar indicates 100 mm. (C) Sampling dates (8 time points) and temperature regimes during the study period. Sampling was performed every ca. 1.5 month for a year. The red line indicates hourly air temperature, and dotted lines represent timings of the sampling.

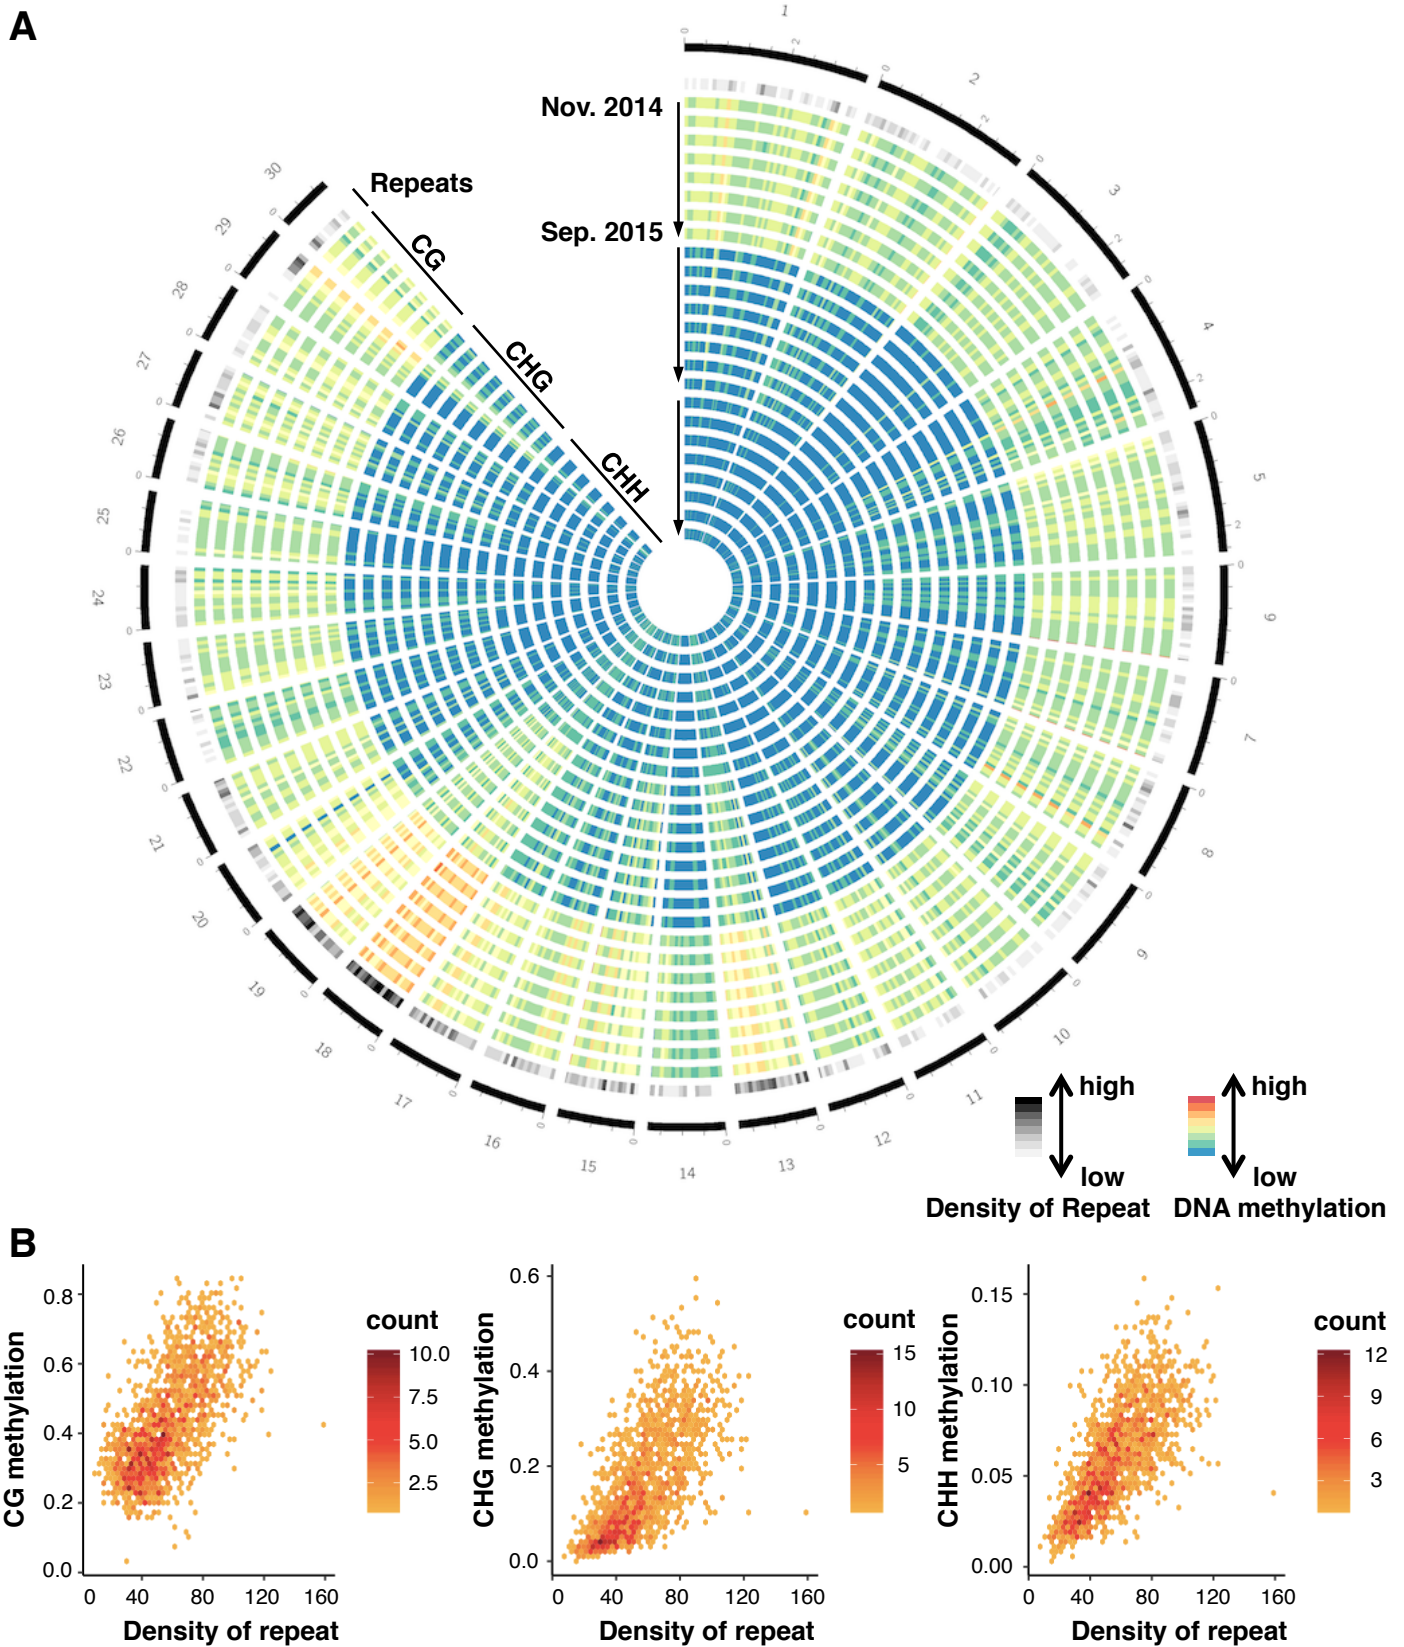

**Fig. 2. Genomic pattern of DNA methylation across a year.** (A) A circos plot showing seasonal patterns (8 time points) of DNA methylation in CG, CHG, and CHH contexts for the longest 30 scaffolds of *A. halleri*. On the outermost circle, scaffold positions are indicated by numbers and black bars with scales (one scale = 0.4 Mbp). Each shaded/colored circle represents the scaffold-wide distribution of genomic attributes for each 100-Kb window. The second outermost circle represents density of repetitive sequences (including transposable elements). Each tile indicates the density: the lowest in white, the highest in black (0–0.5). The next 24 circles represent DNA methylation levels at 8 time points (starting from Nov 24, 2014 to Sep 8, 2015, towards the inner circles shown by the arrows) for CG, CHG, and CHH contexts, respectively. Colors in each tile indicates level of methylation: the lowest as blue, the highest as red (0–0.9 for CG context, 0–0.5 for the others). (B) Scattering plots comparing CG, CHG, and CHH DNA methylation against TE density for all 100 kbp windows across the 30 scaffolds.

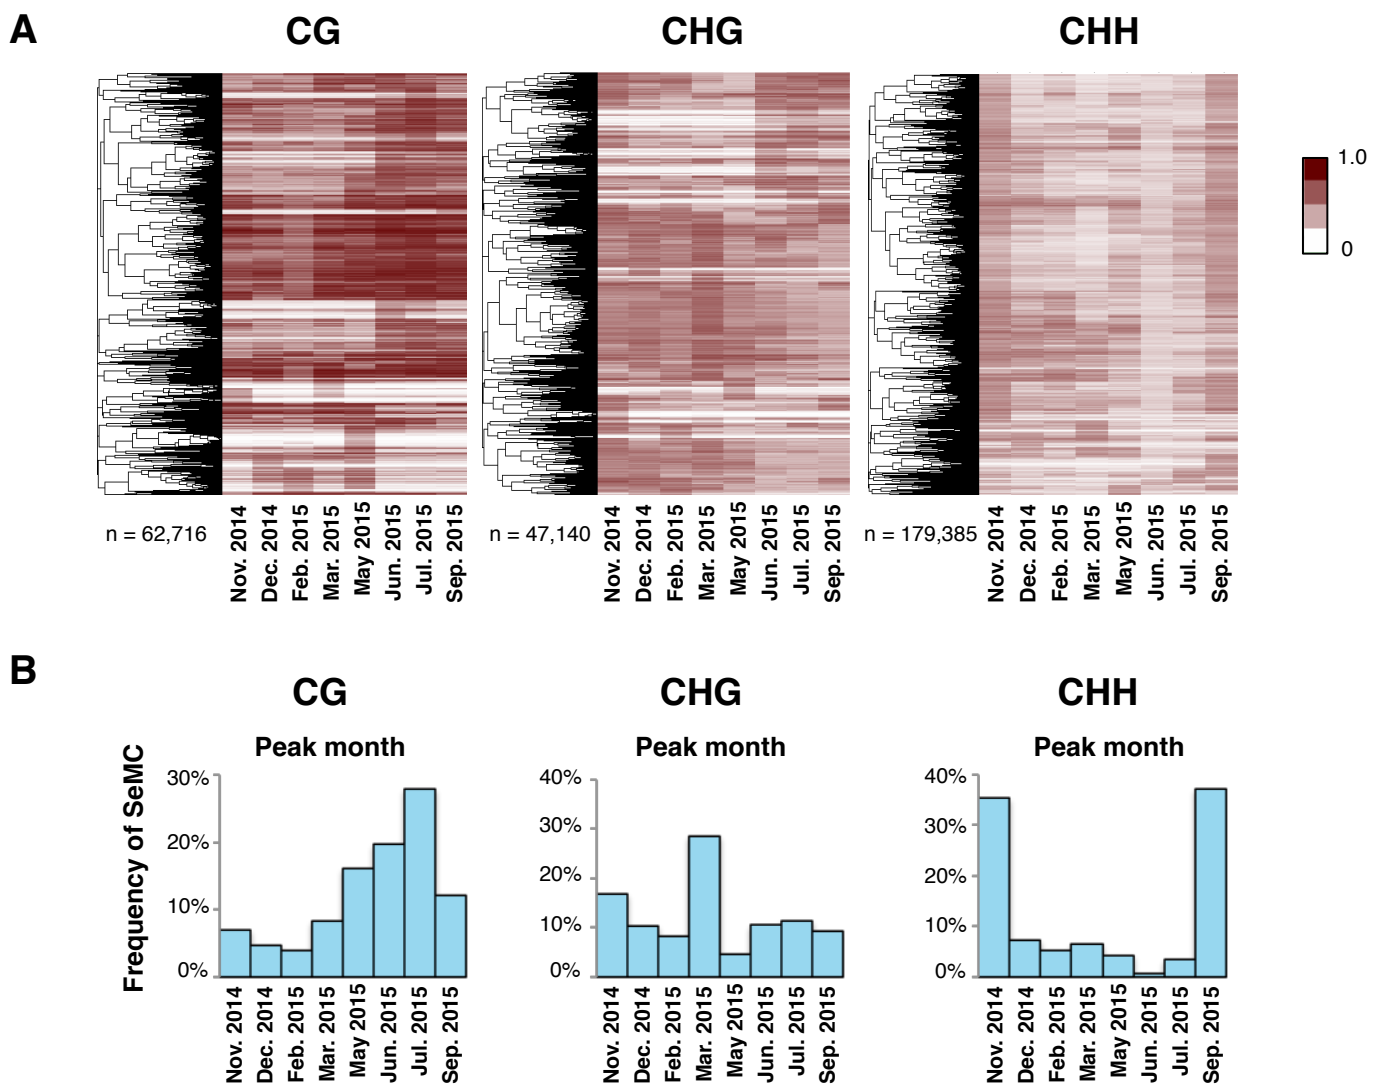

**Fig. 3. Annual patterns of seasonally-methylated cytosines (SeMCs).** (A) Heatmaps of seasonally methylated cytosines (SeMCs) in CG, CHG, and CHH contexts (from left to right; n = 62,716, 47,140, 179,385, respectively). Each row indicates a series of DNA methylation ratios across a year in each position in the genome (0: unmethylated, 1; fully methylated). The dendrogram on the left of each heatmap represents the result of hierarchical clustering of SeMCs. Distance in the dendrogram was based on Pearson's correlation coefficient. (B) Barplot showing the distribution of peak timings of methylation level for the SeMCs in CG, CHG, and CHH contexts (from left to right, respectively).



**A**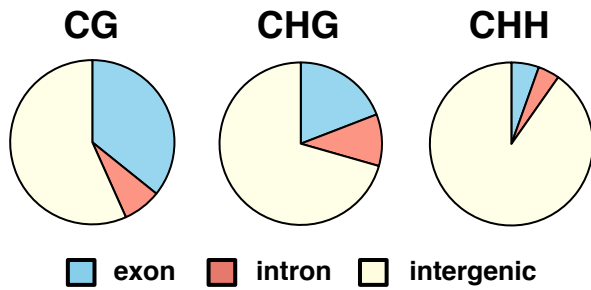**B**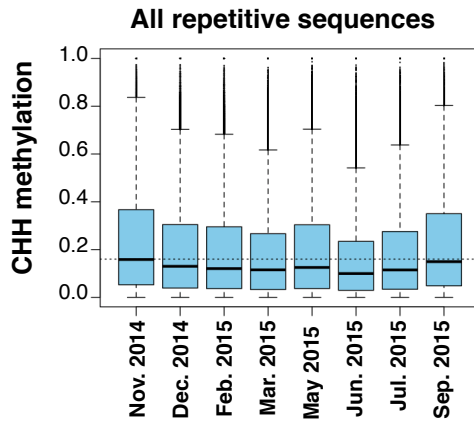**C**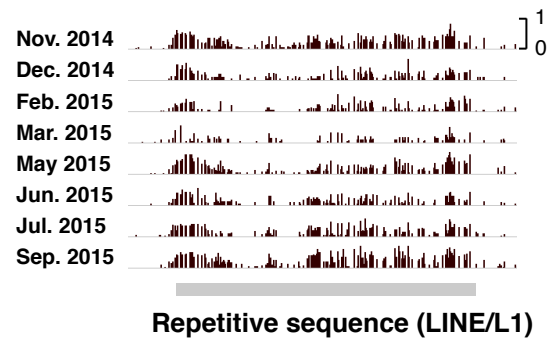**D**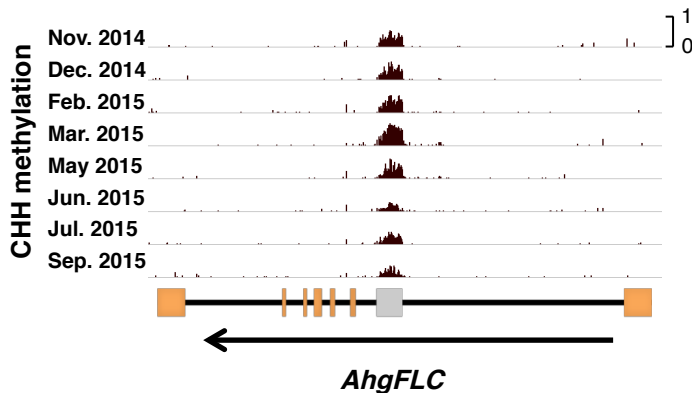**E**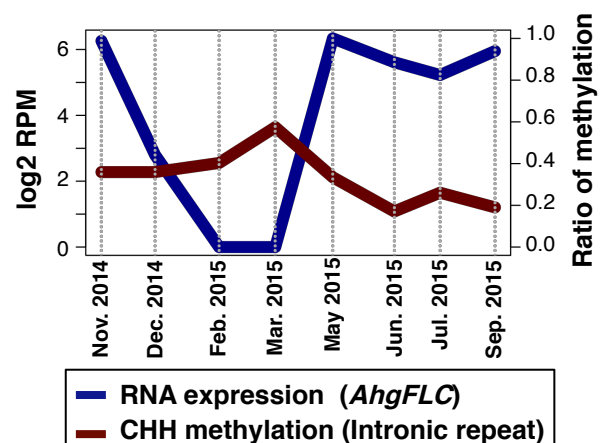

**Fig. 4. SeMCs in the CG, CHG, and CHH contexts, and seasonal patterns in CHH DNA methylation levels.** (A) Pie charts indicating locations (exon, intron, and intergenic regions) of seasonally methylated cytosines (SeMCs) in CG, CHG, and CHH contexts (from left to right, respectively). (B) Boxplots of CHH methylation at 8 time points in repetitive elements. The boxes span from the first to the third quartiles, the thick black bars inside the boxes are the medians, whiskers above and below the boxes represent  $1.5 \times$  interquartile ranges from the quartiles. Dotted line indicates the median CHH methylation level in Nov. 2014. (C and D) Browser views for seasonal patterns of CHH methylation on repeat sequences in one of LINE/L1 sequences (C) and *AhgFLC* locus (D). Orange rectangles indicates exons. A gray rectangle in the *AhgFLC* locus indicates a repetitive sequence. (E) Comparison between RNA expression of *AhgFLC* and CHH methylation of the repetitive sequence in its intron.

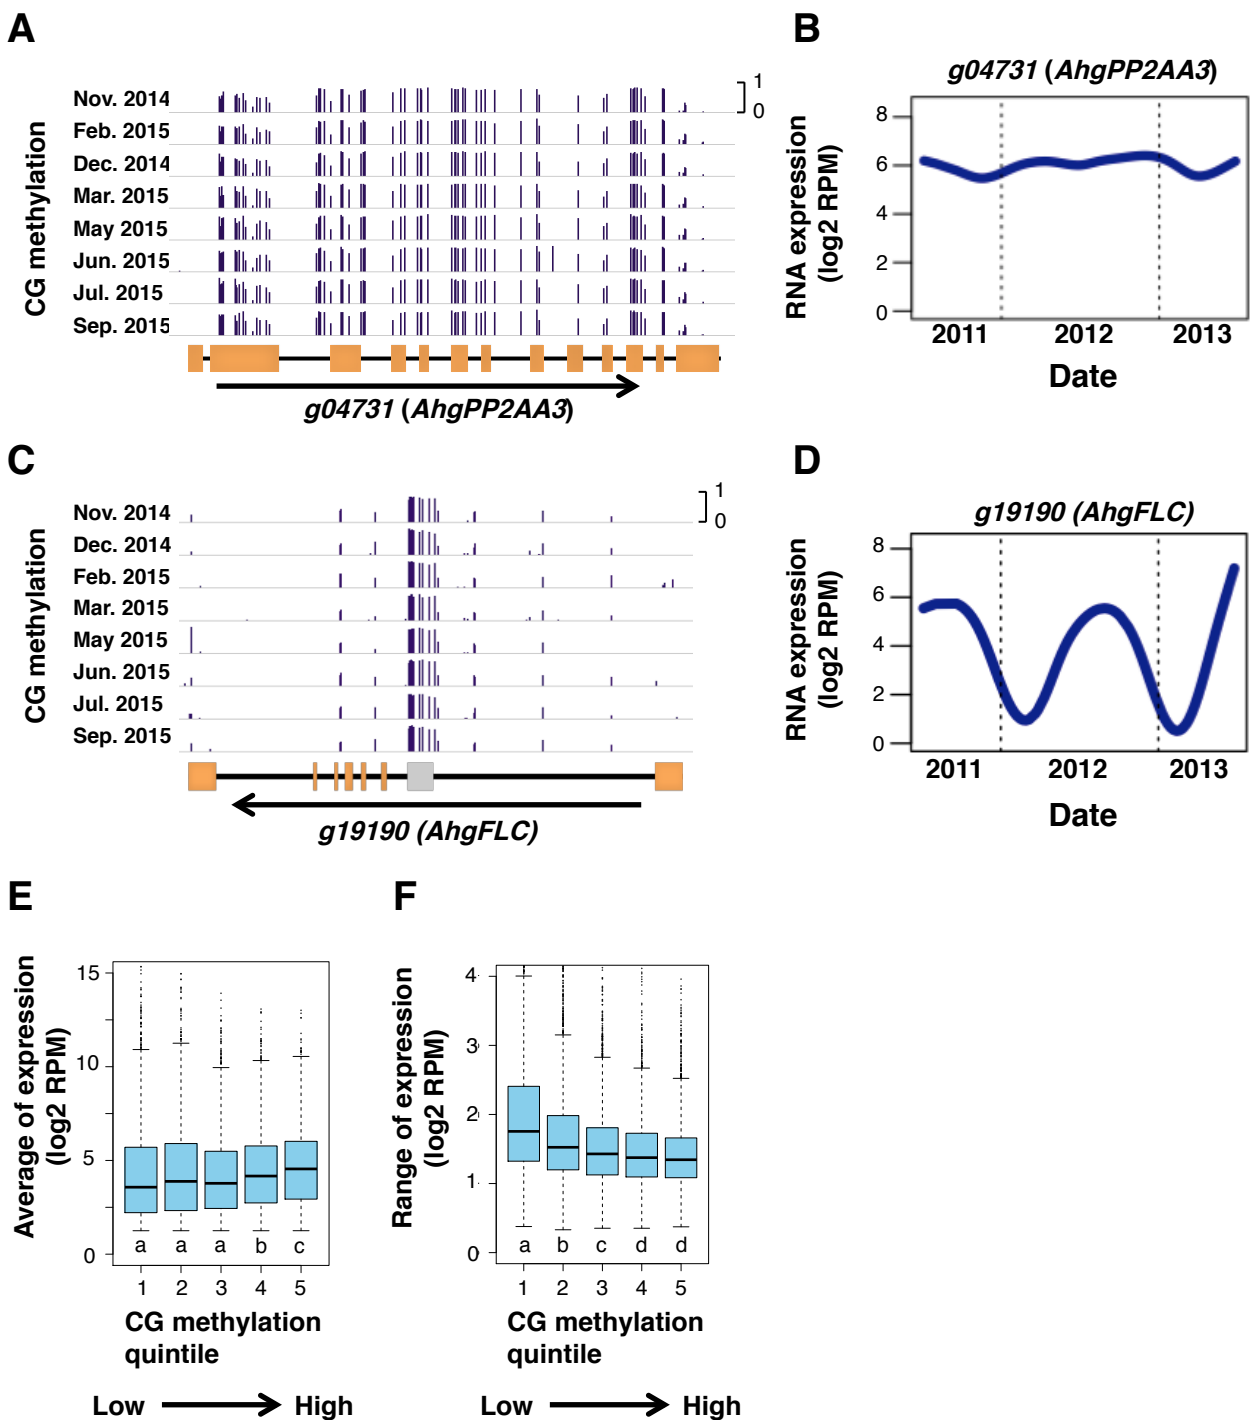

**Fig. 5. CG DNA methylation and stability of gene expression.** (A-D) Browser views of seasonal patterns of CG methylation (A and C) and the two-year dynamics of RNA expression level (B and D; from September 2011 to August 2013) for *AhgPP2AA3* (*g04731*) and *AhgFLC* (*g19190*), respectively. Orange rectangles indicate exons. A gray rectangle indicates a repetitive sequence in the *AhgFLC* locus. (E, F) Boxplots showing relationship between DNA methylation in CG context and the average (E) and range (F) of RNA expression of genes. Only expressed genes (average expression level (log<sub>2</sub>(RPM) > 1)) are used for these analyses. Genes were split into five bins according to quintiles of genic DNA methylation in CG context. The boxes span from the first to the third quartiles, the bands inside the boxes are the medians, whiskers above and below the boxes represent 1.5 × interquartile ranges from the quartiles. Different letters represent significant differences between groups in the Mann-Whitney test,  $P < 0.01$  adjusted for multiple comparisons.
